# Supplementary material for: Predation on Drosophila suzukii within Hedges in the Agricultural Landscape
Source: MDPI journal article supplement (doi:10.3390/insects12040305), 2021-03-30
Supplement: s1 [file s1]

## Supplemental Figures

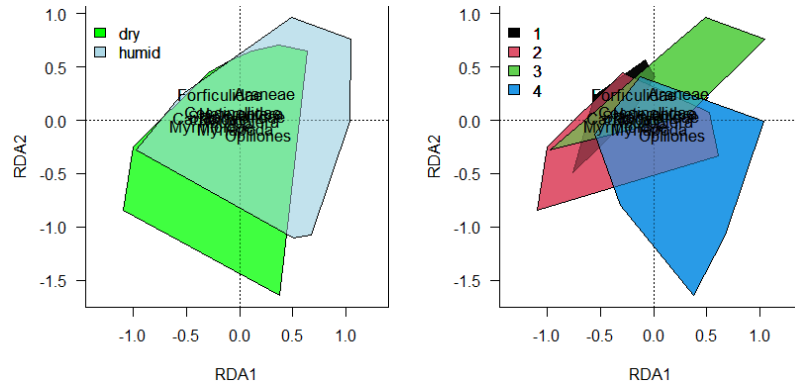

**Figure S1.** Transformation-based redundancy analyses (999 permutations) of the composition of predator groups in dry (green) and humid (blue) hedges ( $F_1 = 1.565$ ,  $P = 0.158$ ; left plot) and over four sampling periods ( $F_3 = 1.692$ ,  $P = 0.053$ ; right plot).

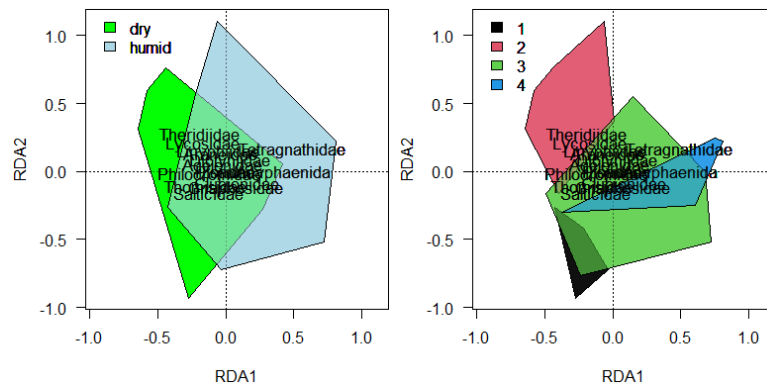

**Figure S2.** Transformation-based redundancy analyses (999 permutations) of the composition of Araneae families in dry (green) and humid (blue) hedges ( $F_1 = 1.746$ ,  $P = 0.065$ ; left plot) and over four sampling periods ( $F_1 = 1.480$ ,  $P = 0.071$ ; right plot).
